# Supplementary material for: Effects of Providing High-Fat versus High-Carbohydrate Meals on Daily and Postprandial Physical Activity and Glucose Patterns: a Randomised Controlled Trial
Source: MDPI journal article supplement (doi:10.3390/nu10050557), 2018-04-30
Supplement: s1 [file s1]

1 **Supplementary Online Information**

2 **Methods**

3 **Table S1.** Dietary intake breakdown of the three meals for each of the two experimental diets (HFD and HCD) provided to participants.

|                                | <b>HFD (Days 1-5)</b> |              |               | <b>HCD (Days 1-5)</b> |              |               |
|--------------------------------|-----------------------|--------------|---------------|-----------------------|--------------|---------------|
|                                | <b>Breakfast</b>      | <b>Lunch</b> | <b>Dinner</b> | <b>Breakfast</b>      | <b>Lunch</b> | <b>Dinner</b> |
| <b>Energy (kJ)<sup>2</sup></b> | 4072 ± 344            | 4093 ± 346   | 4140 ± 350    | 4088 ± 346            | 4069 ± 344   | 4232 ± 358    |
| <b>CHO (g)</b>                 | 38.7 ± 3.3            | 39.1 ± 3.3   | 38.7 ± 3.3    | 172.2 ± 14.6          | 170.7 ± 14.4 | 177.3 ± 15.0  |
| <b>Sugars (g)</b>              | 5.3 ± 0.4             | 9.1 ± 0.8    | 16.3 ± 1.4    | 160.5 ± 13.6          | 96.8 ± 8.2   | 90.3 ± 7.6    |
| <b>CHO (% TEI)</b>             | 15 ± 0                | 15 ± 0       | 15 ± 0        | 67 ± 0                | 67 ± 0       | 67 ± 0        |
| <b>Glycemic index</b>          | 63.3 ± 0.0            | 52.7 ± 0.0   | 53.1 ± 0.0    | 47.5 ± 0.0            | 67.6 ± 0.0   | 51.0 ± 0.0    |
| <b>Glycemic load</b>           | 24.5 ± 2.0            | 20.4 ± 1.6   | 19.7 ± 1.6    | 81.8 ± 6.6            | 115.0 ± 9.3  | 90.7 ± 7.3    |
| <b>Protein (g)</b>             | 42.2 ± 3.6            | 42.8 ± 3.6   | 43.5 ± 3.7    | 43.1 ± 3.6            | 43.6 ± 3.7   | 43.9 ± 3.7    |
| <b>Protein (% TEI)</b>         | 18 ± 0                | 18 ± 0       | 18 ± 0        | 18 ± 0                | 18 ± 0       | 18 ± 0        |
| <b>Fat (g)</b>                 | 73.9 ± 6.2            | 74.1 ± 6.3   | 75.3 ± 6.4    | 16.3 ± 1.4            | 16.1 ± 1.4   | 17.6 ± 1.5    |
| <b>Fat (% TEI)</b>             | 67 ± 0                | 67 ± 0       | 67 ± 0        | 15 ± 0                | 15 ± 0       | 15 ± 0        |
| <b>Saturated fat (g)</b>       | 40.7 ± 3.4            | 45.2 ± 3.8   | 29.0 ± 2.5    | 8.9 ± 0.8             | 7.9 ± 0.7    | 2.8 ± 0.2     |
| <b>Polyunsaturated fat (g)</b> | 4.2 ± 0.4             | 2.3 ± 0.2    | 2.1 ± 0.2     | 2.2 ± 0.2             | 1.8 ± 0.1    | 1.3 ± 0.1     |
| <b>Monounsaturated fat (g)</b> | 11.6 ± 1.0            | 18.6 ± 1.6   | 20.9 ± 1.8    | 3.8 ± 0.3             | 4.2 ± 0.4    | 5.4 ± 0.5     |
| <b>Fibre (g)</b>               | 8.1 ± 0.7             | 8.8 ± 0.7    | 12.2 ± 1.0    | 13.2 ± 1.1            | 13.2 ± 1.1   | 22.0 ± 1.9    |

4 Data are mean ± SD. CHO, carbohydrate; HCD, high carbohydrate diet; HFD, high fat diet; TEI, total energy intake.

5

6

7

## 8 Results

9 **Table S2.** Further dietary intake breakdown of the meals and snacks for each of the two Habitual periods for sedentary males with  
10 overweight/obesity (n=7).

|                               | Habitual pre HFD (Days -7 to -1)  |                             |                              |                           |                             |                                   | Habitual pre HCD (Days -7 to -1)   |                             |                                |                           |                             |                                   |
|-------------------------------|-----------------------------------|-----------------------------|------------------------------|---------------------------|-----------------------------|-----------------------------------|------------------------------------|-----------------------------|--------------------------------|---------------------------|-----------------------------|-----------------------------------|
|                               | B/fast                            | AM<br>snacks <sup>1</sup>   | Lunch                        | PM<br>snacks <sup>1</sup> | Dinner                      | Late<br>PM<br>snacks <sup>1</sup> | B/fast                             | AM<br>snacks <sup>1</sup>   | Lunch                          | PM<br>snacks <sup>1</sup> | Dinner                      | Late<br>PM<br>snacks <sup>1</sup> |
| <b>Energy (kJ)</b>            | 1566 ±<br>368 <sup>b,c,d,e</sup>  | 696 ±<br>839 <sup>c,e</sup> | 3294 ±<br>510 <sup>d,f</sup> | 633 ±<br>630 <sup>e</sup> | 3603 ±<br>1156 <sup>f</sup> | 1148 ±<br>1065                    | 1693 ±<br>489 <sup>b,c,d,e,f</sup> | 857 ±<br>897 <sup>c,e</sup> | 2853 ±<br>569 <sup>d,e,f</sup> | 664 ±<br>765 <sup>e</sup> | 3805 ±<br>1128 <sup>f</sup> | 611 ±<br>403                      |
| <b>Energy (%<br/>of DEI)</b>  | 15 ±<br>3 <sup>b,c,d,e</sup>      | 5 ± 6 <sup>c,e</sup>        | 31 ±<br>8 <sup>d,f</sup>     | 5 ± 5 <sup>e</sup>        | 33 ± 10 <sup>f</sup>        | 10 ± 8                            | 16 ±<br>5 <sup>c,d,e,f</sup>       | 7 ± 7 <sup>c,e</sup>        | 27 ±<br>3 <sup>d,e,f</sup>     | 6 ± 7 <sup>e</sup>        | 37 ± 11 <sup>f</sup>        | 6 ± 4                             |
| <b>Sugars (g)</b>             | 15.3 ±<br>6.3                     | 12.1 ±<br>16.6              | 21.8 ±<br>13.9 <sup>d</sup>  | 6.5 ±<br>9.5              | 22.2 ±<br>8.4               | 12.7 ±<br>10.8                    | 19.8 ±<br>8.3 <sup>d</sup>         | 11.4 ±<br>11.3 <sup>e</sup> | 16.5 ±<br>6.5                  | 6.7 ±<br>5.1 <sup>e</sup> | 23.8 ±<br>17.3              | 12.6 ±<br>9.8                     |
| <b>Saturated<br/>fat (g)</b>  | 5.0 ±<br>2.0 <sup>c,e</sup>       | 3.0 ±<br>4.0 <sup>c,e</sup> | 12.7 ±<br>3.4 <sup>d,f</sup> | 2.5 ±<br>3.4 <sup>e</sup> | 11.4 ±<br>4.7 <sup>f</sup>  | 4.2 ±<br>3.2                      | 6.0 ±<br>2.5 <sup>c,e</sup>        | 3.5 ±<br>3.9 <sup>c,e</sup> | 10.4 ±<br>3.0 <sup>d,f</sup>   | 2.9 ±<br>3.5 <sup>e</sup> | 12.9 ±<br>4.4 <sup>f</sup>  | 2.6 ±<br>2.9                      |
| <b>Polyunsat.<br/>fat (g)</b> | 1.8 ±<br>0.9 <sup>c,e</sup>       | 1.0 ±<br>1.1 <sup>c,e</sup> | 5.0 ±<br>0.7 <sup>d,f</sup>  | 0.7 ±<br>0.9 <sup>e</sup> | 5.9 ±<br>3.1 <sup>f</sup>   | 0.9 ±<br>0.8                      | 1.3 ±<br>0.8 <sup>c,e</sup>        | 1.3 ±<br>1.5 <sup>c,e</sup> | 4.9 ±<br>1.8 <sup>d,f</sup>    | 0.8 ±<br>1.4 <sup>e</sup> | 5.9 ±<br>2.5 <sup>f</sup>   | 0.4 ±<br>0.4                      |
| <b>Monounsat.<br/>fat (g)</b> | 3.7 ±<br>2.0 <sup>c,e</sup>       | 1.9 ±<br>2.1 <sup>c,e</sup> | 13.3 ±<br>3.3 <sup>d,f</sup> | 2.2 ±<br>2.9 <sup>e</sup> | 14.3 ±<br>6.1 <sup>f</sup>  | 3.1 ±<br>2.7                      | 3.6 ±<br>1.6 <sup>c,e</sup>        | 3.2 ±<br>3.4 <sup>c,e</sup> | 10.2 ±<br>3.2 <sup>d,f</sup>   | 2.9 ±<br>5.2 <sup>e</sup> | 13.2 ±<br>2.9 <sup>f</sup>  | 1.8 ±<br>1.6                      |
| <b>Fibre (g)</b>              | 6.0 ±<br>2.5 <sup>b,c,d,e,f</sup> | 1.4 ±<br>1.5 <sup>c,e</sup> | 9.5 ±<br>1.8 <sup>d,f</sup>  | 1.0 ±<br>1.5 <sup>e</sup> | 8.5 ±<br>3.2 <sup>f</sup>   | 1.0 ±<br>1.0                      | 5.4 ±<br>2.2 <sup>b,d,e,f</sup>    | 2.2 ±<br>3.0 <sup>c,e</sup> | 7.4 ±<br>1.1 <sup>d,f</sup>    | 1.7 ±<br>1.8 <sup>e</sup> | 7.5 ±<br>2.0 <sup>f</sup>   | 0.6 ±<br>0.4                      |

11 Key: CHO, carbohydrate; DEI, daily energy intake; HCD, high carbohydrate diet; HFD, high fat diet. <sup>1</sup>Snacks are defined as any calorie  
12 consumption at least 15 min following the main meal; <sup>2</sup>Percentage relative to total energy from that mealtime. Data are mean ± SD;  
13 significantly different (P<0.05) within measure <sup>b</sup> compared to AM snacks, <sup>c</sup> compared to Lunch, <sup>d</sup> compared to PM snacks, <sup>e</sup> compared  
14 to Dinner, <sup>f</sup> compared to Late PM snacks.

**Table S3.** Anthropometric and resting energy expenditure measures from overweight, sedentary males (n=8) from baseline, the end of the habitual period, and the end of each experimental dietary period.

|                                          | Time of measure   |             |                  |             |                      |             |
|------------------------------------------|-------------------|-------------|------------------|-------------|----------------------|-------------|
|                                          | Baseline (Day -7) |             | Habitual (Day 0) |             | Experimental (Day 5) |             |
|                                          | Pre-HFD           | Pre-HCD     | Pre-HFD          | Pre-HCD     | HFD                  | HCD         |
| <b>Body composition<sup>1</sup></b>      |                   |             |                  |             |                      |             |
| <b>Body mass (kg)</b>                    | 96.6 ± 10.1       | 96.9 ± 9.4  | 96.3 ± 9.2       | 96.6 ± 9.5  | 96.0 ± 9.3           | 96.1 ± 9.2  |
| <b>Fat mass (kg)</b>                     | 32.0 ± 4.9        | 31.6 ± 4.3  | 31.7 ± 4.8       | 31.4 ± 4.3  | 31.8 ± 4.8           | 31.3 ± 4.0  |
| <b>Lean mass (kg)</b>                    | 61.4 ± 7.3        | 62.0 ± 7.2  | 61.4 ± 6.8       | 61.9 ± 8.0  | 60.9 ± 6.9           | 62.1 ± 9.2  |
| <b>Bone mineral content (kg)</b>         | 3.25 ± 0.47       | 3.29 ± 0.49 | 3.26 ± 0.46      | 3.26 ± 0.45 | 3.278 ± 0.47         | 3.26 ± 0.47 |
| <b>Visceral adipose tissue (kg)</b>      | 1.74 ± 0.62       | 1.74 ± 0.62 | 1.75 ± 0.58      | 1.69 ± 0.49 | 1.70 ± 0.55          | 1.63 ± 0.57 |
| <b>Body fat (%)</b>                      | 34.2 ± 3.9        | 33.8 ± 3.8  | 34.0 ± 4.0       | 33.8 ± 4.2  | 34.3 ± 4.1           | 33.8 ± 3.7  |
| <b>Resting energy expenditure (kJ/d)</b> | 9056 ± 1047       | 9045 ± 1328 | 8806 ± 1069      | 9005 ± 1353 | 8759 ± 819           | 8504 ± 843  |

<sup>1</sup>From DXA measures; NS differences were observed between pre-condition measures.

**Table S4.** Wear time for activity monitor analysis across the habitual (Day -7 to Day 0) and Experimental (Day 1 – 5) periods for overweight, sedentary males (n=8).

|                                                      | Time of measure                   |           |                                  |           |
|------------------------------------------------------|-----------------------------------|-----------|----------------------------------|-----------|
|                                                      | Habitual (Day -7 to 0)<br>Pre-HFD | Pre-HCD   | Experimental (Day 1 to 5)<br>HFD | HCD       |
| <b>ActivPal</b> , total wear time (min) <sup>1</sup> | 970 ± 95                          | 984 ± 103 | 955 ± 69                         | 965 ± 80  |
| <b>Actigraph</b> , wear time (min) <sup>1</sup>      | 950 ± 134                         | 926 ± 166 | 938 ± 168                        | 917 ± 145 |
| Pre-prandial wear time, breakfast (min)              | 58 ± 3                            | 58 ± 3    | 49 ± 14                          | 51 ± 9    |
| Pre-prandial wear time, lunch (min)                  | 61 ± 1                            | 60 ± 2    | 59 ± 3                           | 60 ± 2    |
| Pre-prandial wear time, dinner (min)                 | 61 ± 1                            | 60 ± 2    | 61 ± 0                           | 60 ± 3    |
| Postprandial wear time, breakfast (min)              | 176 ± 9                           | 176 ± 10  | 169 ± 14                         | 173 ± 12  |
| Postprandial wear time, lunch (min)                  | 176 ± 6                           | 178 ± 4   | 175 ± 7                          | 178 ± 4   |
| Postprandial wear time, dinner (min)                 | 163 ± 17                          | 145 ± 29  | 164 ± 16                         | 149 ± 21  |
| <b>Sensewear</b> , wear time <sup>2</sup>            |                                   |           |                                  |           |
| Waking (h)                                           | 951 ± 246                         | 932 ± 101 | 904 ± 232                        | 966 ± 127 |
| Sleep (h) <sup>3</sup>                               | 469 ± 104                         | 471 ± 103 | 488 ± 296                        | 435 ± 115 |

<sup>1</sup>From Activpal and ActiGraph activity monitors where only waking hours were analysed, when total wake time was >10 h. <sup>2</sup>From SenseWear Armband monitors estimated from total wear time (>98%) over 24 h. <sup>3</sup>Data are n=7 due to one participant removing the monitor overnight for one condition. Data are mean ± SD.
